# Supplementary material
Source: PubMed Central journal article supplement (PMC3070566)

Supplement Figure 1

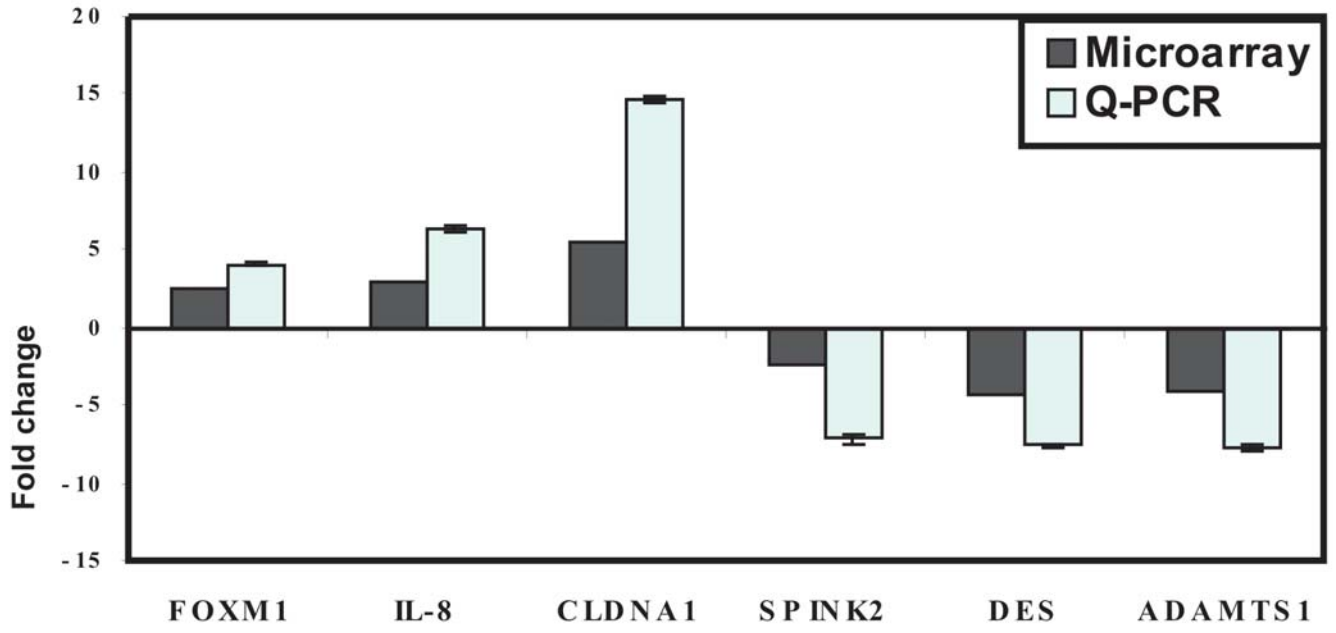

Supplement: mmc1.pdf [file mmc1.pdf]

A

## Invasion of cells

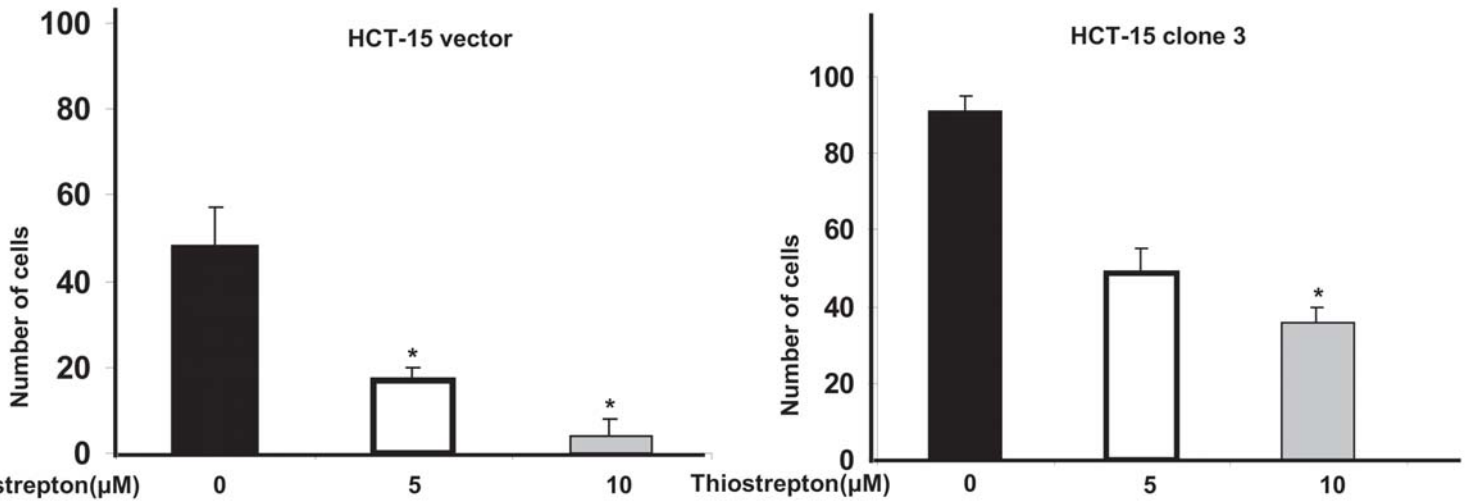

B

## Migration of cells

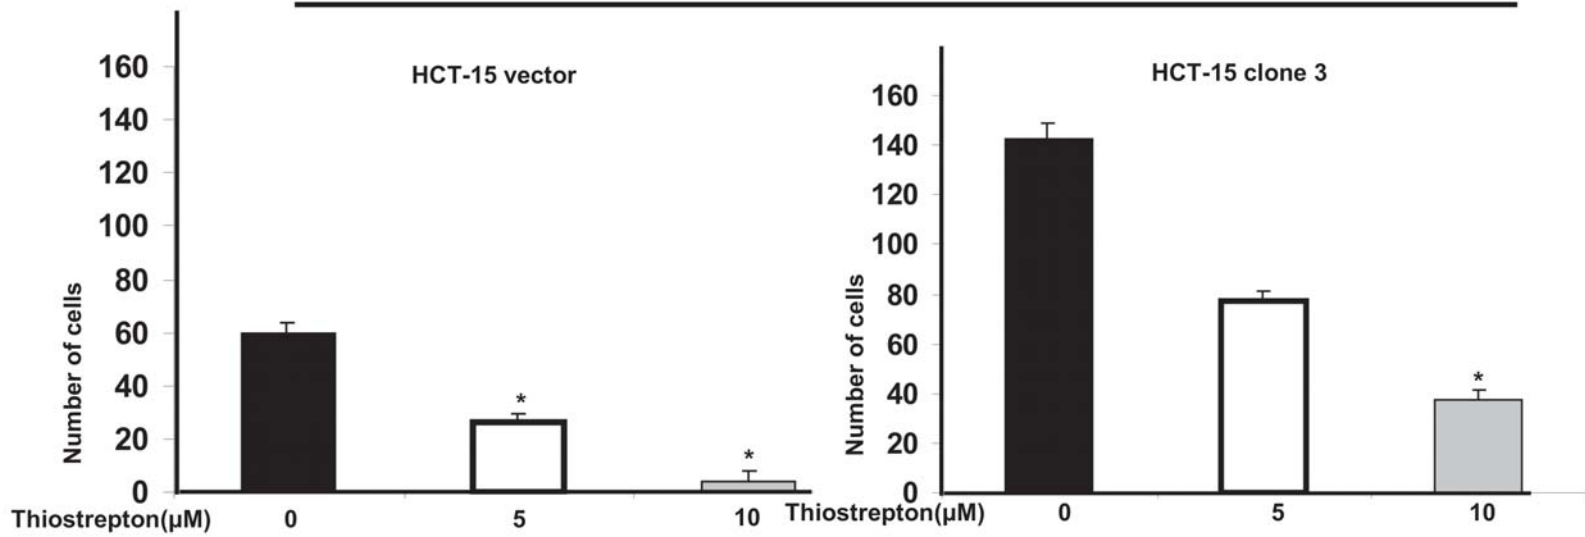

Supplement: mmc5.pdf [file mmc5.pdf]

Supplement Figure 2

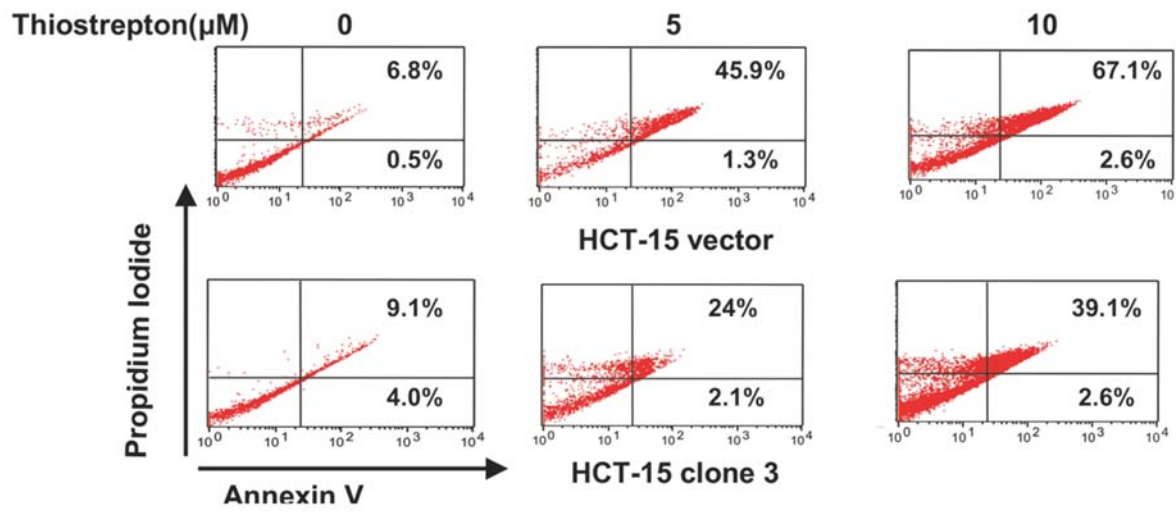

Supplement: mmc6.pdf [file mmc6.pdf]

A

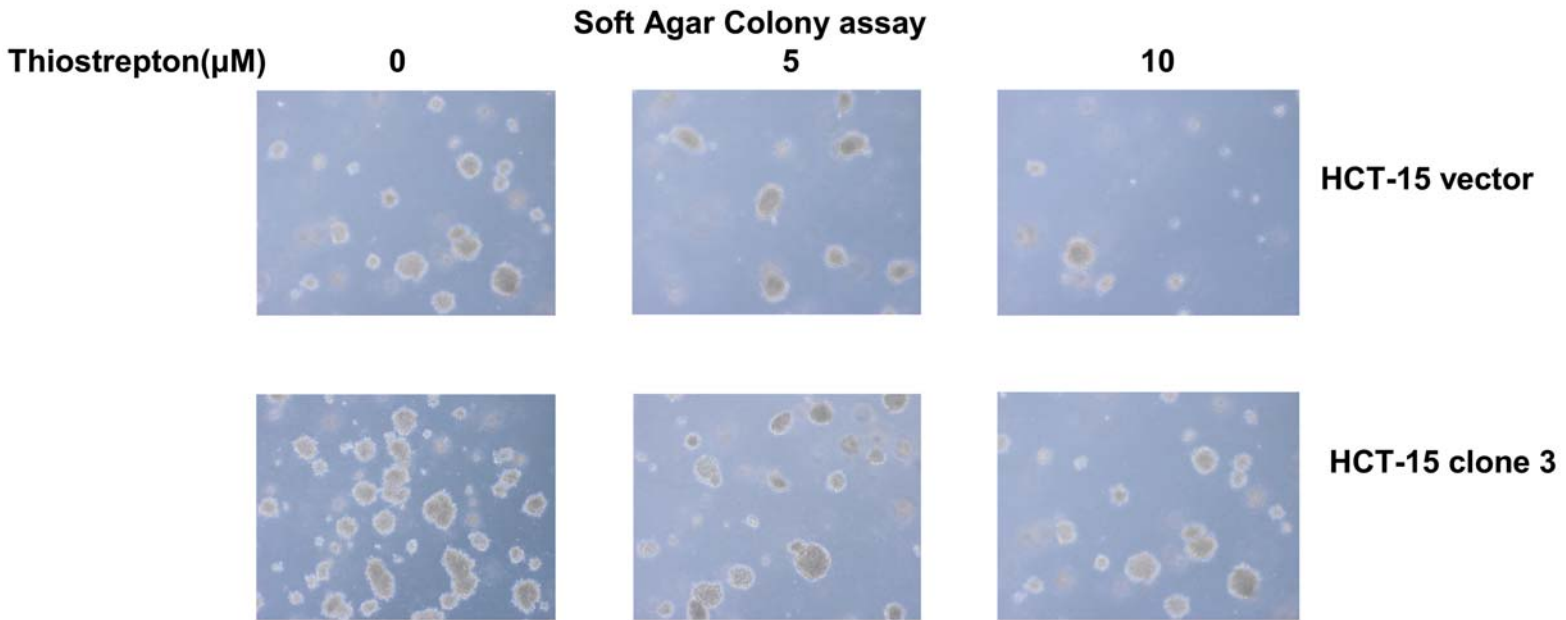

B

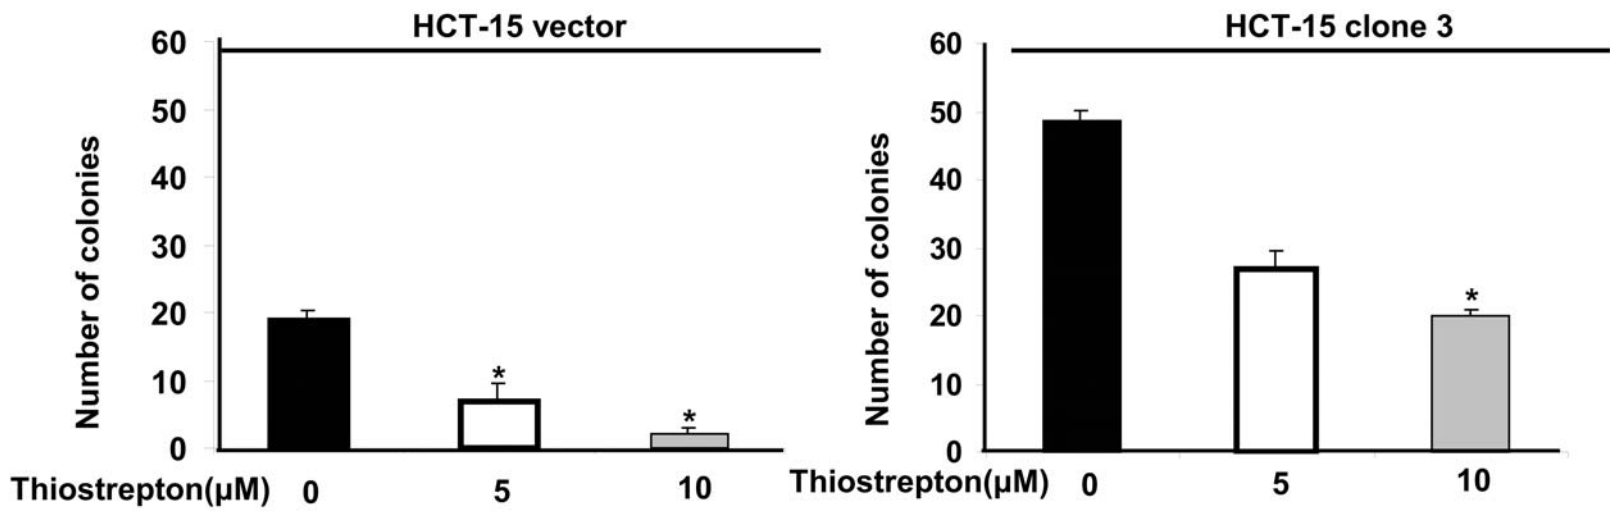

Supplement: mmc7.pdf [file mmc7.pdf]
